# Supplementary material for: Use of Microbial Fertilizers in Grapevine Seedling Production
Source: Research Square preprint supplement (doi:10.21203/rs.3.rs-8475362/v1), 2026-01-06
Supplement: Supplementary file 1 [file d384351acfec24d6c1bc1ff5.docx]

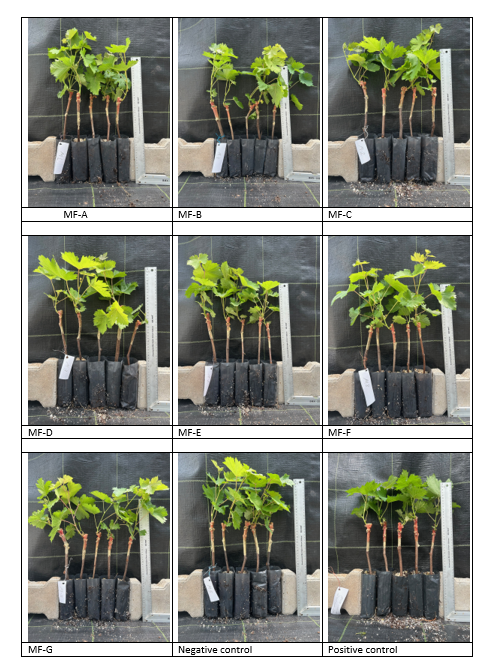


**Supplementary Figure S1.** Effect of microbial fertilizer applications on grapevine seedling growth
